# Supplementary material for: The short-term impact of probiotic consumption on the oral cavity microbiome
Source: PubMed Central journal article supplement (PMC6041349; doi:10.1038/s41598-018-28491-x), 2018-07-11
Supplement: 41598_2018_28491_MOESM1_ESM.pdf [file 41598_2018_28491_MOESM1_ESM.pdf]

1  
2  
3  
4  
5  
6  
7  
8  
9  
10  
11  
12  
13  
14  
15  
16  
17  
18  
19  
20  
21  
22  
23

**The short-term impact of probiotic consumption on the oral cavity microbiome**

Erik Dassi<sup>1</sup>, Pamela Ferretti<sup>1</sup>, Giuseppina Covello<sup>1</sup>, HTM-CMB-2015, Roberto Bertorelli<sup>2</sup>,  
Michela A. Denti<sup>1</sup>, Veronica De Sanctis<sup>2</sup>, Adrian Tett<sup>1</sup>, Nicola Segata\*<sup>1</sup>



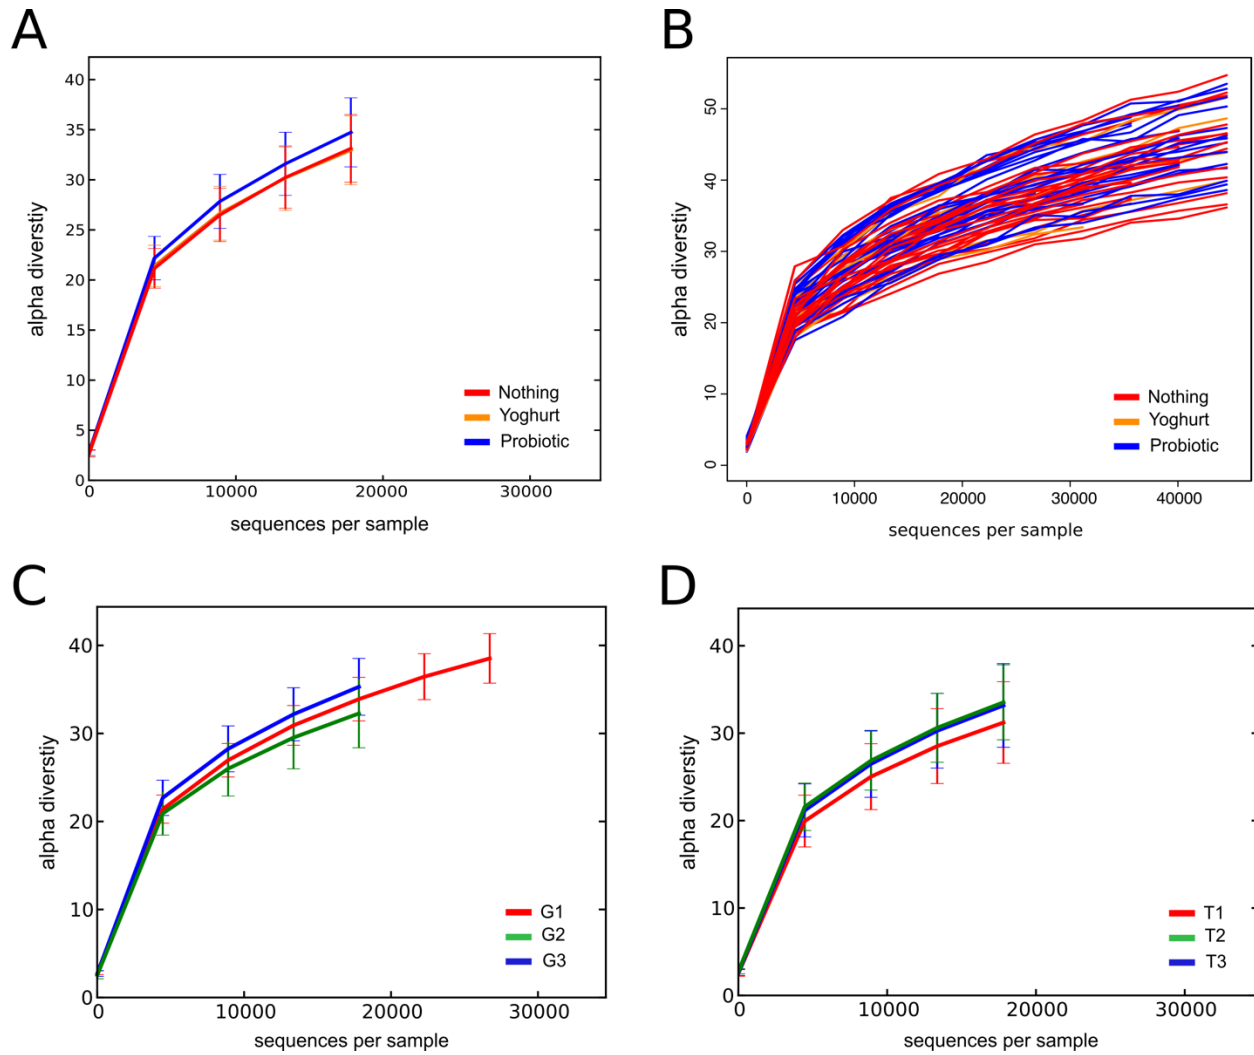

29

30

31 **Supplementary Figure 2.** Alpha rarefaction curves for the PD-Whole Tree metric, with samples

32 colored by intake (**A** and **B**), by group (**C**), and timepoint (**D**).

33

34

35

36

37

38

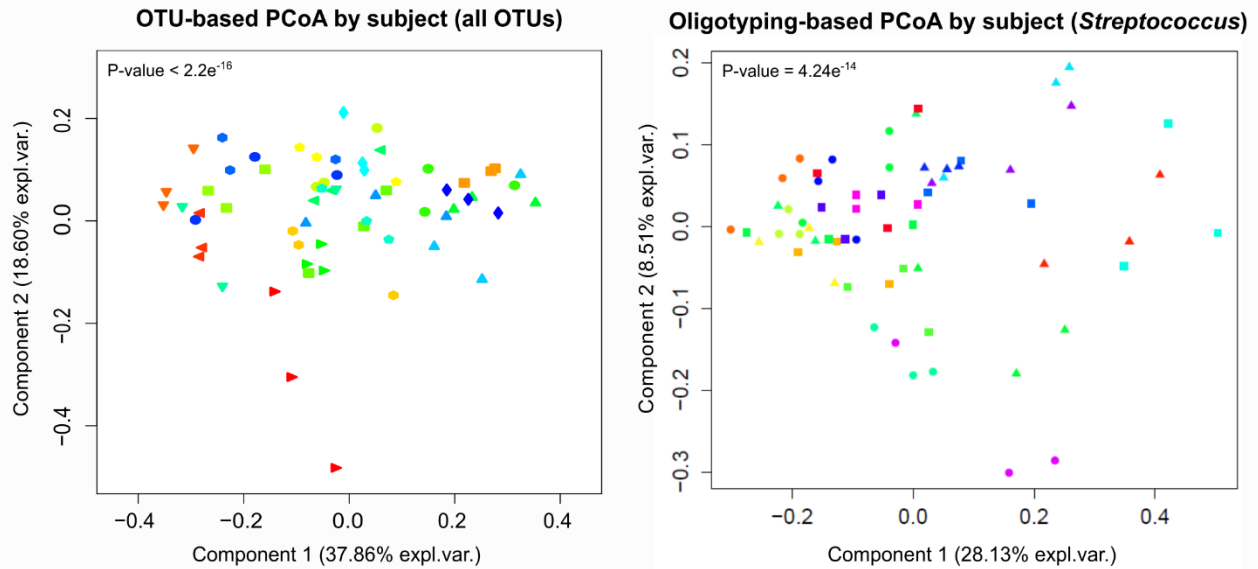

39

40 **Supplementary Figure 3.** OTU-based (including all OTUs, left) and oligotype-based PCoA by  
 41 subject (including only *Streptococcus* oligotypes, right). OTU-based PCoA employs the  
 42 weighted Unifrac metric while the oligotyping PCoA uses the Bray-Curtis metric. The proportion  
 43 of explained variance for both principal components is indicated next to the component name.  
 44 The indicated Wilcoxon test P-value represents the significance of the lower beta diversity  
 45 observed within samples of the same subject with respect to samples of other subjects (intra  
 46 subject vs inter subject beta diversity).

47

48

49

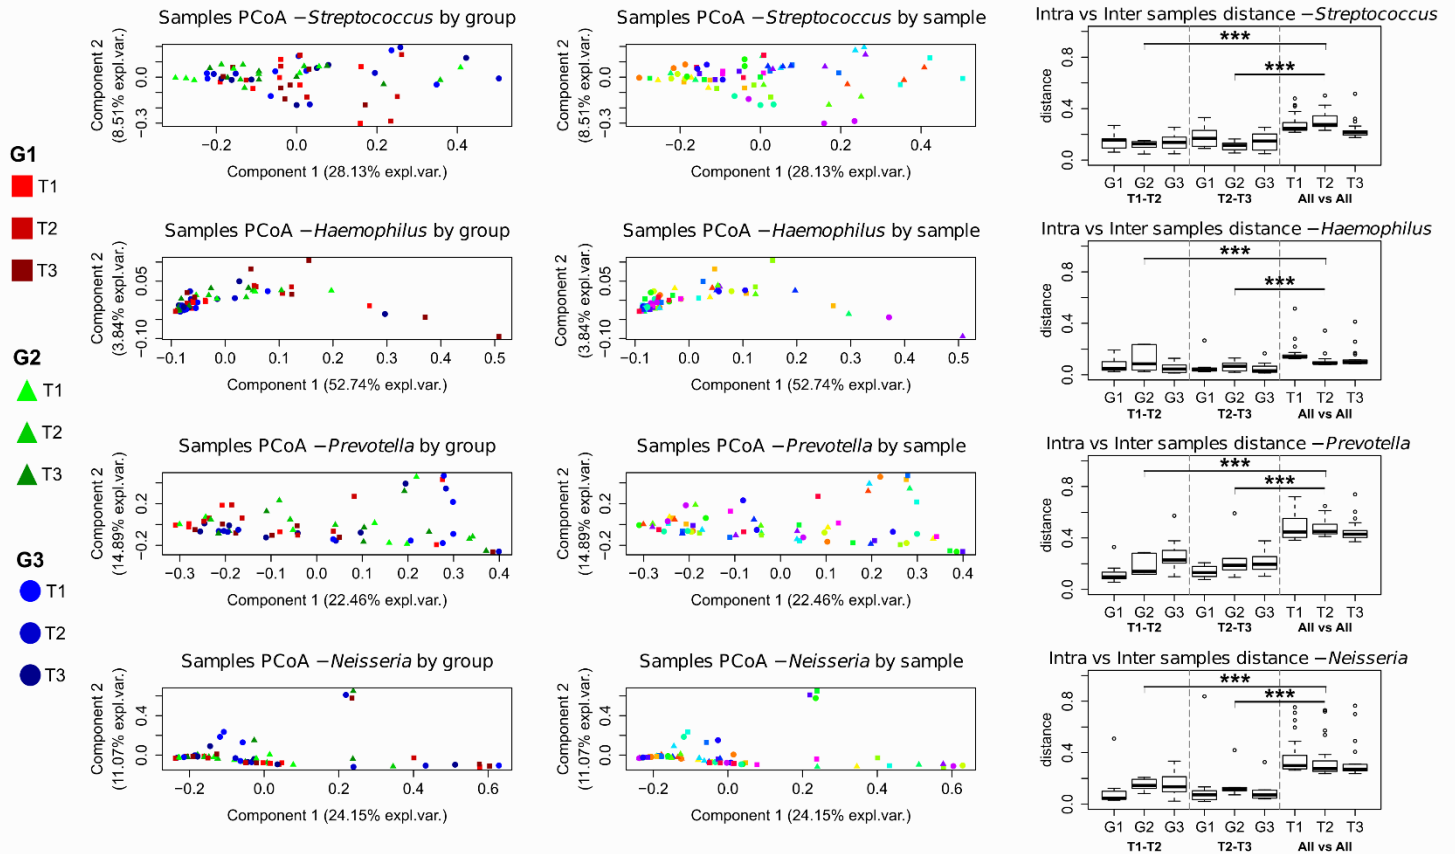

50

51 **Supplementary Figure 4.** Oligotype-based PCoA (Bray-Curtis metric) divided by group and  
 52 sample (left and center columns), intra- and inter-samples distance comparison (right column)  
 53 for the four main relevant genera (*Streptococcus*, *Haemophilus*, *Prevotella* and *Neisseria*). Intra-  
 54 samples distance is defined as the distance between two time points of the same group, while the  
 55 inter-samples distance is based on single timepoints across all groups. The proportion of  
 56 explained variance for each principal component is indicated next to the component name.  
 57 Distances diversity (Bray-Curtis metric) P-values are computed between intra-subject beta  
 58 diversity and all diversity values (i.e. T1-T2 vs All, T2-T3 vs All) by using the Wilcoxon test  
 59 (\*\*\*) indicates P-value <.001).

60

61

62

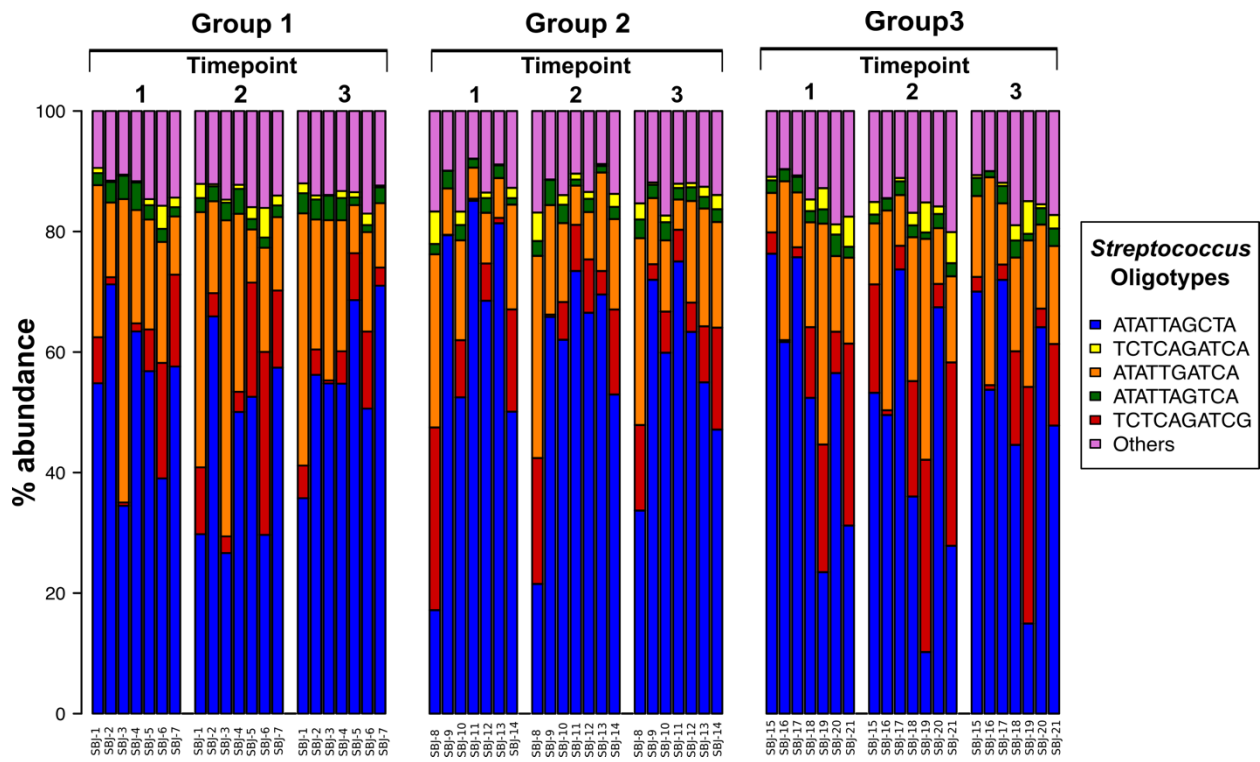

63

64

65 **Supplementary Figure 5.** Probiotic *Streptococcus* oligotypes across timepoints and study

66 groups.

67

68

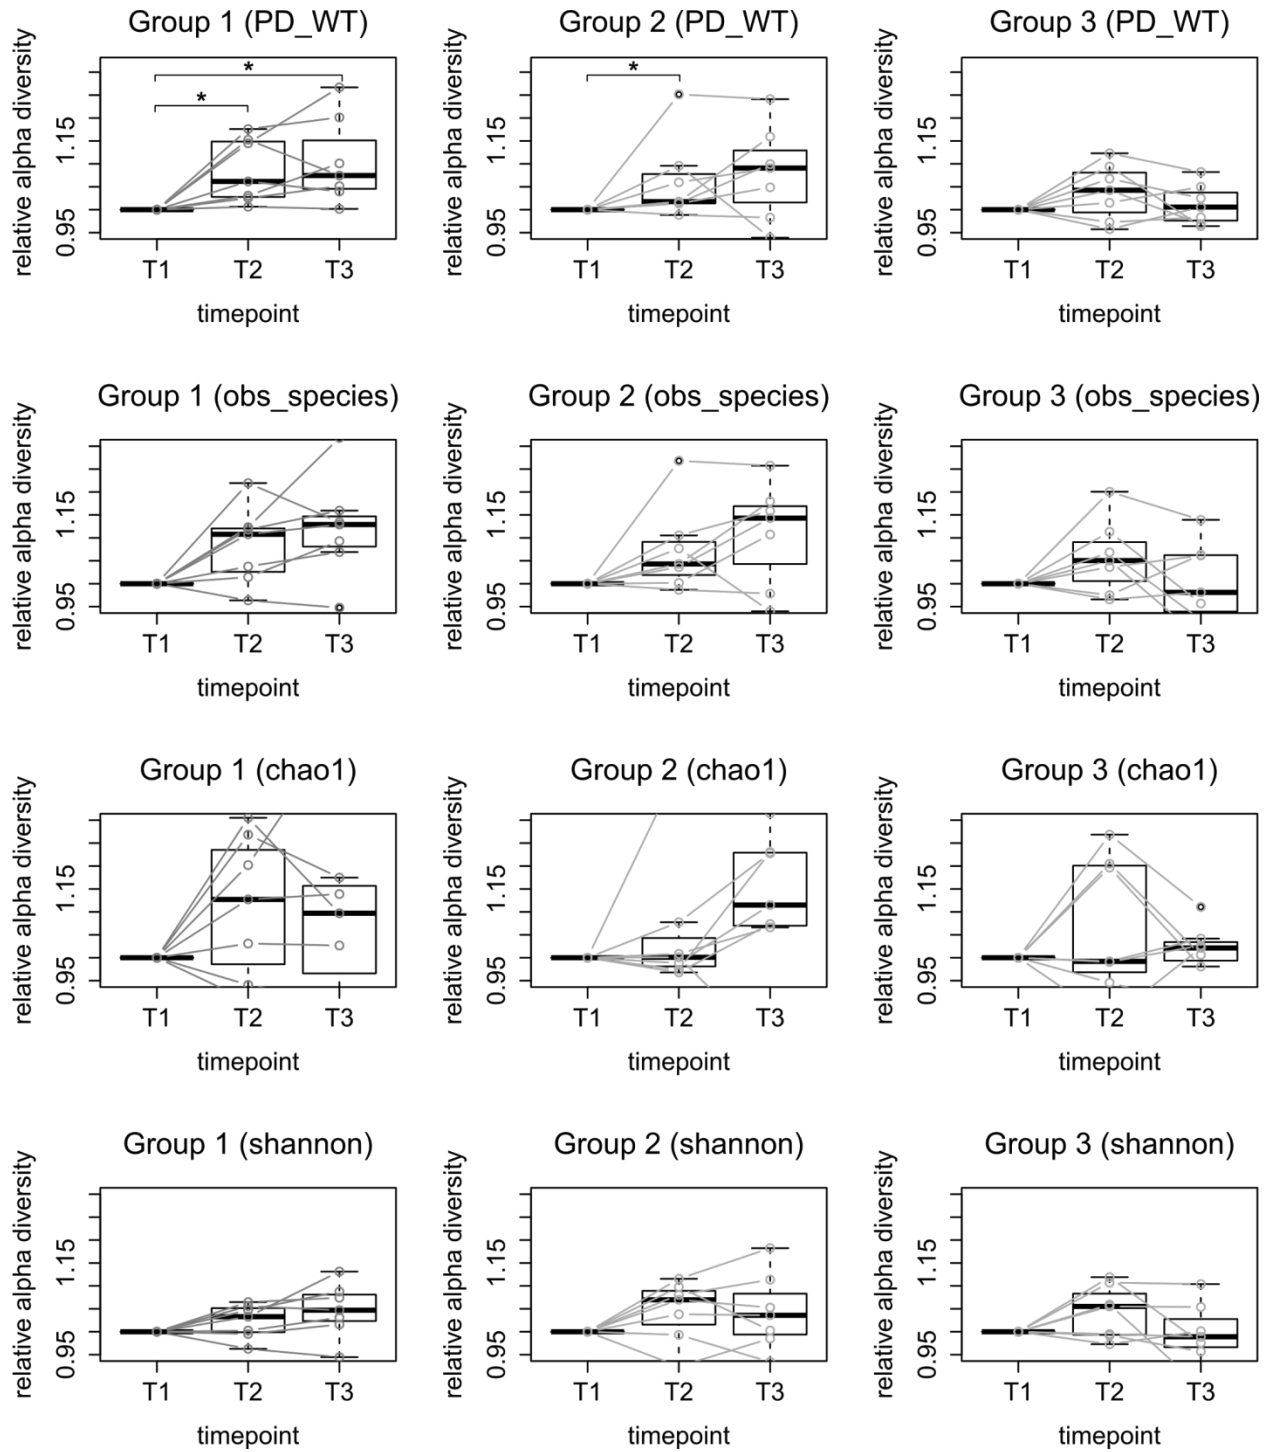

69

70

71 **Supplementary Figure 6.** Alpha diversity computed with four different metrics (PD\_Whole  
72 Tree, Observed species, Chao1 and Shannon) on the three study groups (\* for Wilcoxon test P-  
73 values <.05).

74

75

76

77

78

79

80

81

82

83

84

85



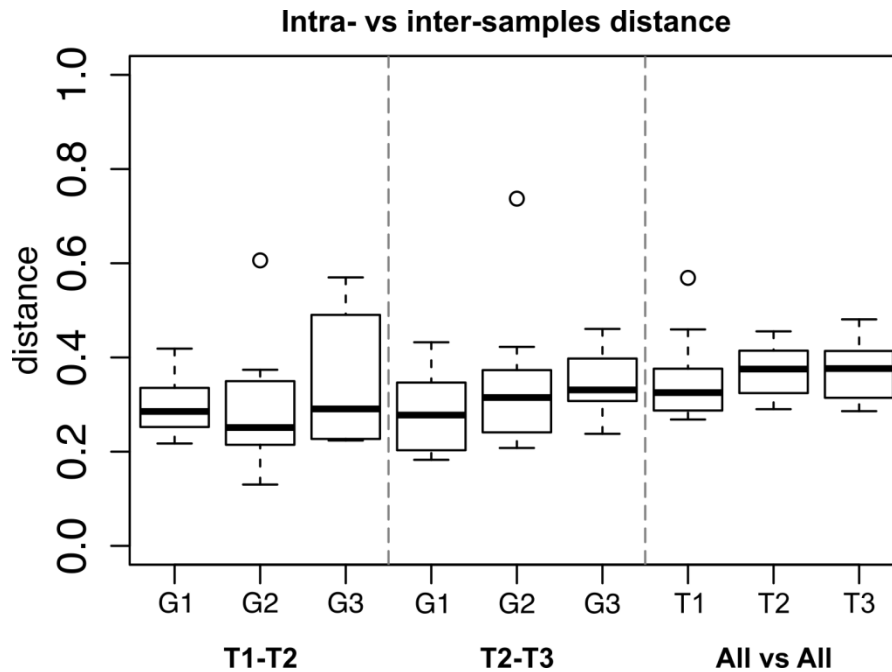

86

87

88 **Supplementary Figure 7.** OTU-based (beta diversity computed with the weighted Unifrac  
 89 metric) inter-sample (difference between samples in each timepoint across groups) and intra-  
 90 sample distances (variation of each group between timepoints). No statistically significant values  
 91 were found.

92

93

94

95

96

97

98

99

100

101

102 **Supplementary Tables**

| #SampleID | BarcodeSequence | Treatment | Timepoint | CombinedTreatmentTimepoint | Subject |
|-----------|-----------------|-----------|-----------|----------------------------|---------|
| S1        | ACTTCCAACCTC    | 2         | 3         | 2_3                        | 1       |
| S2        | TATACCGCTGCG    | 2         | 2         | 2_2                        | 1       |
| S3        | GGCCAGTTCCTA    | 2         | 1         | 2_1                        | 1       |
| S4        | GAGCCATCTGTA    | 1         | 3         | 1_3                        | 2       |
| S5        | CAACTCCCCTGA    | 1         | 2         | 1_2                        | 2       |
| S6        | CGAGCAATCCTA    | 1         | 1         | 1_1                        | 2       |
| S7        | TAACGTGTGTGC    | 3         | 3         | 3_3                        | 3       |
| S8        | TACAGCGCATA     | 3         | 2         | 3_2                        | 3       |
| S9        | CTGCTATTCCTC    | 3         | 1         | 3_1                        | 4       |
| S10       | TGCGCTGAATGT    | NA        | 1         | NA_1                       | 5       |
| S11       | ATGGGTTCGTC     | H2O       | -         | H2O_-                      | -       |
| S12       | ACGAGACTGATT    | 3         | 1         | 3_1                        | 3       |
| S13       | CGTAATTGCCGC    | 3         | 1         | 3_1                        | 6       |
| S14       | AGGCTTACGTGT    | 1         | 2         | 1_2                        | 7       |
| S15       | TGTCGCAAATAG    | 1         | 1         | 1_1                        | 7       |
| S16       | CATTCGTGGCGT    | 3         | 2         | 3_2                        | 6       |
| S17       | TCGACATCTCTT    | 2         | 3         | 2_3                        | 8       |
| S18       | AGTTACGAGCTA    | H2O       | -         | H2O_-                      | -       |
| S19       | GCAACACCATCC    | 2         | 3         | 2_3                        | 9       |
| S20       | GAATACCAAGTC    | 2         | 2         | 2_2                        | 9       |
| S21       | GATCCCACGTAC    | YOGURT    | -         | YOGURT_-                   | -       |
| S22       | GGACTTCCAGCT    | 1         | 3         | 1_3                        | 7       |
| S23       | GTGGTGGTTTCC    | 3         | 3         | 3_3                        | 6       |
| S24       | AGCGGAGGTTAG    | 2         | 1         | 2_1                        | 9       |
| S25       | GATTCCGGCTCA    | 1         | 3         | 1_3                        | 10      |
| S26       | GCTCGAAGATTC    | 1         | 2         | 1_2                        | 10      |
| S27       | GTCGACAGAGGA    | 1         | 1         | 1_1                        | 10      |
| S28       | TGTGAATTCGGA    | NA        | 3         | NA_3                       | 11      |
| S29       | ACCATAGCTCCG    | NA        | 2         | NA_2                       | 11      |
| S30       | AGATTGACCAAC    | NA        | 1         | NA_1                       | 11      |
| S31       | CAAACAACAGCT    | H2O       | -         | H2O_-                      | -       |
| S32       | ACCAGTGACTCA    | NA        | 3         | NA_3                       | 12      |
| S33       | TTGGCTCTATTC    | 3         | 3         | 3_3                        | 13      |
| S34       | GTTGTTCTGGGA    | 3         | 2         | 3_2                        | 13      |

|     |              |        |    |          |    |
|-----|--------------|--------|----|----------|----|
| S35 | GTACGATATGAC | 3      | 1  | 3_1      | 13 |
| S36 | GTCGTGTAGCCT | NA     | 2  | NA_2     | 12 |
| S37 | GTGTTGTCGTGC | 3      | 1R | 3_1R     | 14 |
| S38 | ACAATAGACACC | 3      | 2  | 3_2      | 14 |
| S39 | CTATCTCCTGTC | 3      | 3  | 3_3      | 14 |
| S40 | AAGGCGCTCCTT | -      | -  | --       | -  |
| S41 | TACGAGCCCTAA | -      | -  | --       | -  |
| S42 | GTATCTGCGCGT | -      | -  | --       | -  |
| S43 | CCAATACGCCTG | -      | -  | --       | -  |
| S44 | AATTGTGTCGGA | -      | -  | --       | -  |
| S45 | TGTAACGCCGAT | H2O    | -  | H2O_-    | -  |
| S46 | GTTCTCTTCTCG | H2O    | -  | H2O_-    | -  |
| S47 | AACTAGTTCAGG | 3      | 1  | 3_1      | 14 |
| S48 | ATCACCAGGTGT | -      | -  | --       | -  |
| S49 | TCTCTACCACTC | 2      | 1R | 2_1R     | 15 |
| S50 | CATCCCTCTACT | 2      | 1  | 2_1      | 15 |
| S51 | TACTACGTGGCC | H2O    | -  | H2O_-    | -  |
| S52 | GAACACTTTGGA | 1      | 3  | 1_3      | 16 |
| S53 | GCATATGCACTG | 1      | 2  | 1_2      | 16 |
| S54 | GCGATATATCGC | 1      | 1R | 1_1R     | 16 |
| S55 | GTAGATCGTGTA | 1      | 1  | 1_1      | 16 |
| S56 | ATCCTTTGGTTC | 2      | 2  | 2_2      | 8  |
| S57 | CTCACAACCGTG | PROBIO | -  | PROBIO_- | -  |
| S58 | TAGTATGCGCAA | 2      | 3  | 2_3      | 15 |
| S59 | GGTGACTAGTTC | 2      | 2  | 2_2      | 15 |
| S60 | TCCCTTGTCTCC | 2      | 1  | 2_1      | 8  |
| S61 | CCACAGATCGAT | 1      | 3  | 1_3      | 17 |
| S62 | CGGTCAATTGAC | 1      | 2  | 1_2      | 17 |
| S63 | ACTCACAGGAAT | 1      | 1  | 1_1      | 17 |
| S64 | TAATACGGATCG | 1      | 3  | 1_3      | 18 |
| S65 | CACTACGCTAGA | 1      | 2  | 1_2      | 18 |
| S66 | CGAGGAAAGTC  | 1      | 1  | 1_1      | 18 |
| S67 | GATCTGCGATCC | 2      | 3  | 2_3      | 19 |
| S68 | TGCATACTGG   | 2      | 2  | 2_2      | 19 |
| S69 | AGCAGAACATCT | 2      | 2  | 2_2      | 20 |
| S70 | CGTAAGATGCCT | 2      | 1  | 2_1      | 20 |
| S71 | ATTCTGCCGAAG | H2O    | -  | H2O_-    | -  |
| S72 | TGGTCAACGATA | 2      | 1  | 2_1      | 19 |
| S73 | TATCGACACAAG | 3      | 1  | 3_1      | 21 |

|     |              |     |   |       |    |
|-----|--------------|-----|---|-------|----|
| S74 | GTGGAGTCTCAT | 1   | 2 | 1_2   | 22 |
| S75 | ATGATGAGCCTC | 1   | 1 | 1_1   | 22 |
| S76 | TCGGAATTAGAC | 3   | 1 | 3_1   | 23 |
| S77 | TGCAGTCCTCGA | 1   | 3 | 1_3   | 22 |
| S78 | CAAATTCGGGAT | H2O | - | H2O_- | -  |
| S79 | CAGCTCATCAGC | 2   | 3 | 2_3   | 20 |
| S80 | AGTCGAACGAGG | 3   | 3 | 3_3   | 23 |
| S81 | TGGAGTAGGTGG | NA  | 1 | NA_1  | 12 |
| S82 | GCGTTCTAGCTG | 3   | 3 | 3_3   | 21 |
| S83 | AGCATGTCCCGT | 3   | 2 | 3_2   | 21 |
| S84 | ATCGCACAGTAA | 3   | 2 | 3_2   | 23 |
| S85 | CTCACCTAGGAA | -   | - | -_-   | -  |
| S86 | AGTTGAGGCATT | NA  | 3 | NA_3  | 24 |
| S87 | GATGTTCGCTAG | 2   | 3 | 2_3   | 25 |
| S88 | TTGGGTACACGT | 3   | 3 | 3_3   | 4  |
| S89 | TTGCGTTAGCAG | NA  | 2 | NA_2  | 24 |
| S90 | AGTCGTGCACAT | 2   | 2 | 2_2   | 25 |
| S91 | CATTATGGCGTG | 3   | 2 | 3_2   | 4  |
| S92 | ACCGGTATGTAC | NA  | 1 | NA_1  | 24 |
| S93 | ATGTCACCGCTG | -   | - | -_-   | -  |
| S94 | ATGGCTGTCAGT | -   | - | -_-   | -  |
| S95 | TAGGCATGCTTG | -   | - | -_-   | -  |
| S96 | GCTGTACGGATT | 2   | 1 | 2_1   | 25 |

103

104 **Supplementary Table 1.** Complete list of sample-specific barcodes

105

| Sample     | Reads number |
|------------|--------------|
| <b>S1</b>  | 50526        |
| <b>S10</b> | 46977        |
| <b>S11</b> | 6665         |
| <b>S12</b> | 51079        |
| <b>S13</b> | 20495        |
| <b>S14</b> | 27616        |
| <b>S15</b> | 54144        |
| <b>S16</b> | 52966        |
| <b>S17</b> | 48616        |
| <b>S18</b> | 5689         |

|            |       |
|------------|-------|
| <b>S19</b> | 27388 |
| <b>S2</b>  | 35639 |
| <b>S20</b> | 45784 |
| <b>S21</b> | 11971 |
| <b>S22</b> | 57370 |
| <b>S23</b> | 38848 |
| <b>S24</b> | 48008 |
| <b>S25</b> | 44994 |
| <b>S26</b> | 45549 |
| <b>S27</b> | 37001 |
| <b>S28</b> | 49413 |
| <b>S29</b> | 42653 |
| <b>S3</b>  | 46768 |
| <b>S30</b> | 53523 |
| <b>S31</b> | 8907  |
| <b>S32</b> | 43243 |
| <b>S33</b> | 50998 |
| <b>S34</b> | 45130 |
| <b>S35</b> | 44395 |
| <b>S36</b> | 36871 |
| <b>S37</b> | 25443 |
| <b>S38</b> | 45526 |
| <b>S39</b> | 18892 |
| <b>S4</b>  | 43149 |
| <b>S45</b> | 5094  |
| <b>S46</b> | 9432  |
| <b>S47</b> | 38238 |
| <b>S49</b> | 28819 |
| <b>S5</b>  | 44005 |
| <b>S50</b> | 53621 |
| <b>S51</b> | 3454  |
| <b>S52</b> | 49281 |
| <b>S53</b> | 53320 |
| <b>S54</b> | 39694 |
| <b>S55</b> | 54313 |
| <b>S56</b> | 46405 |
| <b>S57</b> | 56272 |
| <b>S58</b> | 46044 |
| <b>S59</b> | 54384 |

|            |       |
|------------|-------|
| <b>S6</b>  | 42087 |
| <b>S60</b> | 54205 |
| <b>S61</b> | 45554 |
| <b>S62</b> | 51480 |
| <b>S63</b> | 36904 |
| <b>S64</b> | 33864 |
| <b>S65</b> | 44308 |
| <b>S66</b> | 32996 |
| <b>S67</b> | 54979 |
| <b>S68</b> | 19663 |
| <b>S69</b> | 54256 |
| <b>S7</b>  | 40795 |
| <b>S70</b> | 45037 |
| <b>S71</b> | 1319  |
| <b>S72</b> | 55541 |
| <b>S73</b> | 36903 |
| <b>S74</b> | 50243 |
| <b>S75</b> | 49103 |
| <b>S76</b> | 46690 |
| <b>S77</b> | 43081 |
| <b>S78</b> | 5738  |
| <b>S79</b> | 49973 |
| <b>S8</b>  | 39161 |
| <b>S80</b> | 48575 |
| <b>S81</b> | 24173 |
| <b>S82</b> | 38928 |
| <b>S83</b> | 42462 |
| <b>S84</b> | 40829 |
| <b>S86</b> | 35517 |
| <b>S87</b> | 45406 |
| <b>S88</b> | 50658 |
| <b>S89</b> | 44453 |
| <b>S9</b>  | 38436 |
| <b>S90</b> | 45953 |
| <b>S91</b> | 27628 |
| <b>S92</b> | 38070 |
| <b>S96</b> | 32260 |

107 **Supplementary Table 2.** Total million reads per sample

108
